# Supplementary material
Source: PubMed Central journal article supplement (PMC4766451)
Supplement: EMBR-16-1378-s002.pdf [file EMBR-16-1378-s002.pdf]

## Expanded View Figures

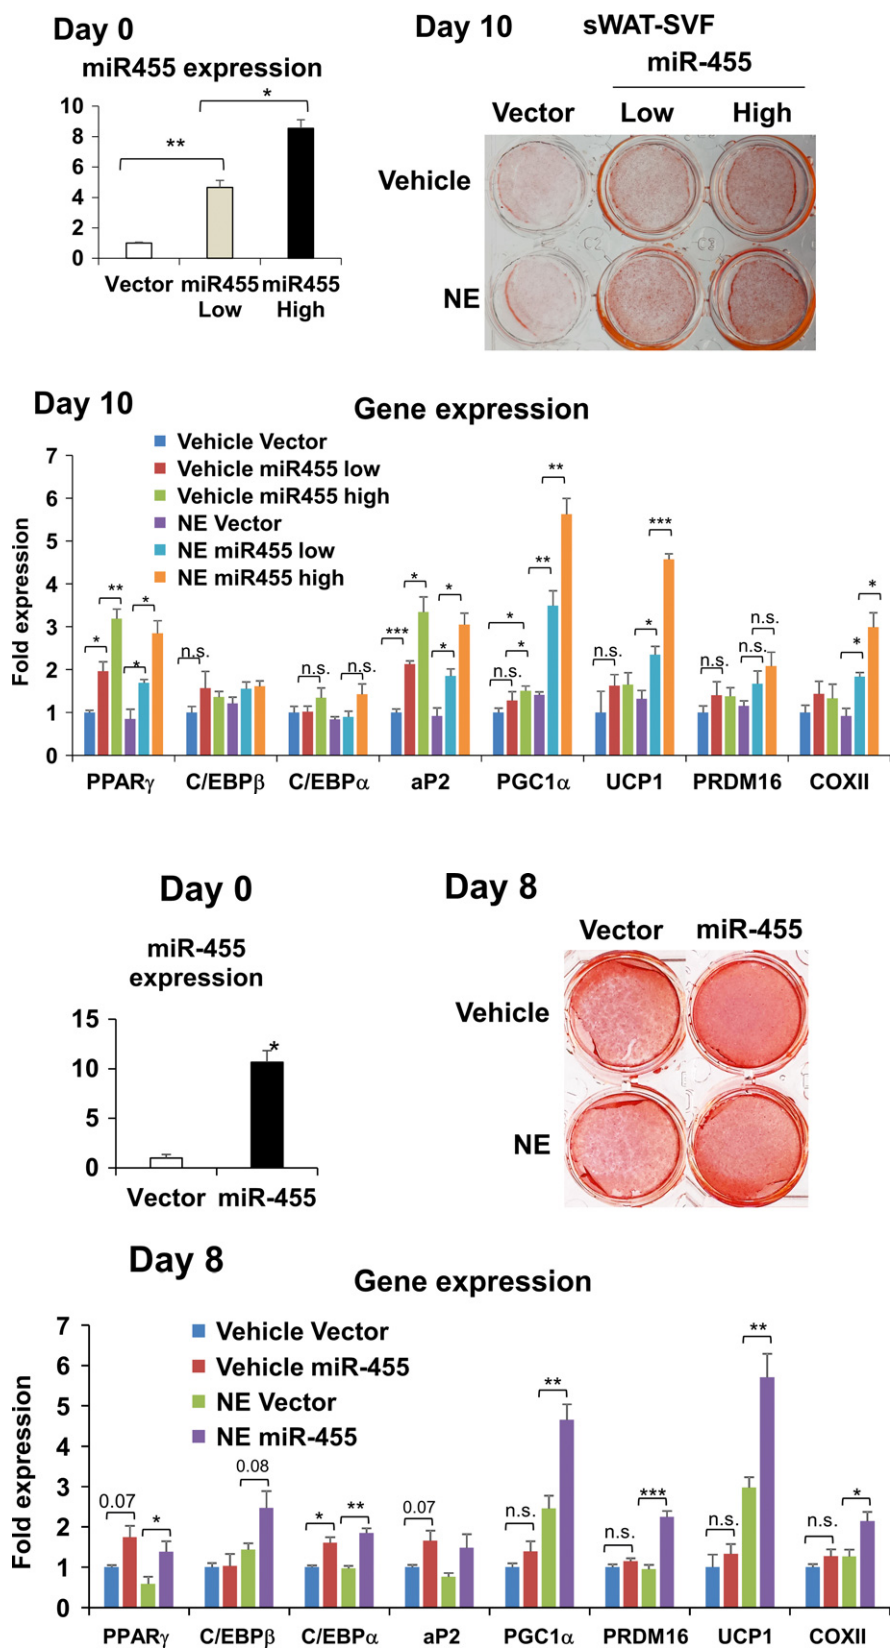

**Figure EV1. miR-455 induced brown adipogenesis of primary sWAT-SVFs.** SVF was isolated from subcutaneous white adipose tissue (sWAT) of C57BL/6 mice, plated in a cell culture dish, and transduced with different dosages of miR-455 and control (vector) lentiviruses to achieve different levels (low or high) of miR-455 overexpression. At confluence, the cells were induced to differentiate by standard differentiation protocol (see Materials and Methods) with supplement of 1 mM rosiglitazone. On day 10, cells were treated with 100 mM norepinephrine (NE) for 4 h and stained with Oil Red O, and RNA was isolated for gene expression analysis by qRT-PCR. Data were analyzed with Student's *t*-test and are presented as mean  $\pm$  SEM of a representative from three independent experiments each performed in quadruplicates ( $*P < 0.05$ ,  $**P < 0.01$ , and  $***P < 0.001$ ; n.s., non-significant).

**Figure EV2. miR-455 committed sWAT-ScaPCs to the brown adipogenic lineage.** ScaPCs isolated from subcutaneous adipose tissues as described previously [17] were transduced with miR-455 or control (vector) lentiviruses and induced to differentiate by standard differentiation protocol (see Materials and Methods). On day 8, cells were treated with 100 mM norepinephrine (NE) for 4 h and then stained with Oil Red O, and RNA was isolated for gene expression analysis by qRT-PCR. Data were analyzed with Student's *t*-test and are presented as mean  $\pm$  SEM of a representative from three independent experiments each performed in quadruplicates ( $*P < 0.05$ ,  $**P < 0.01$ , and  $***P < 0.001$ ; n.s., non-significant).

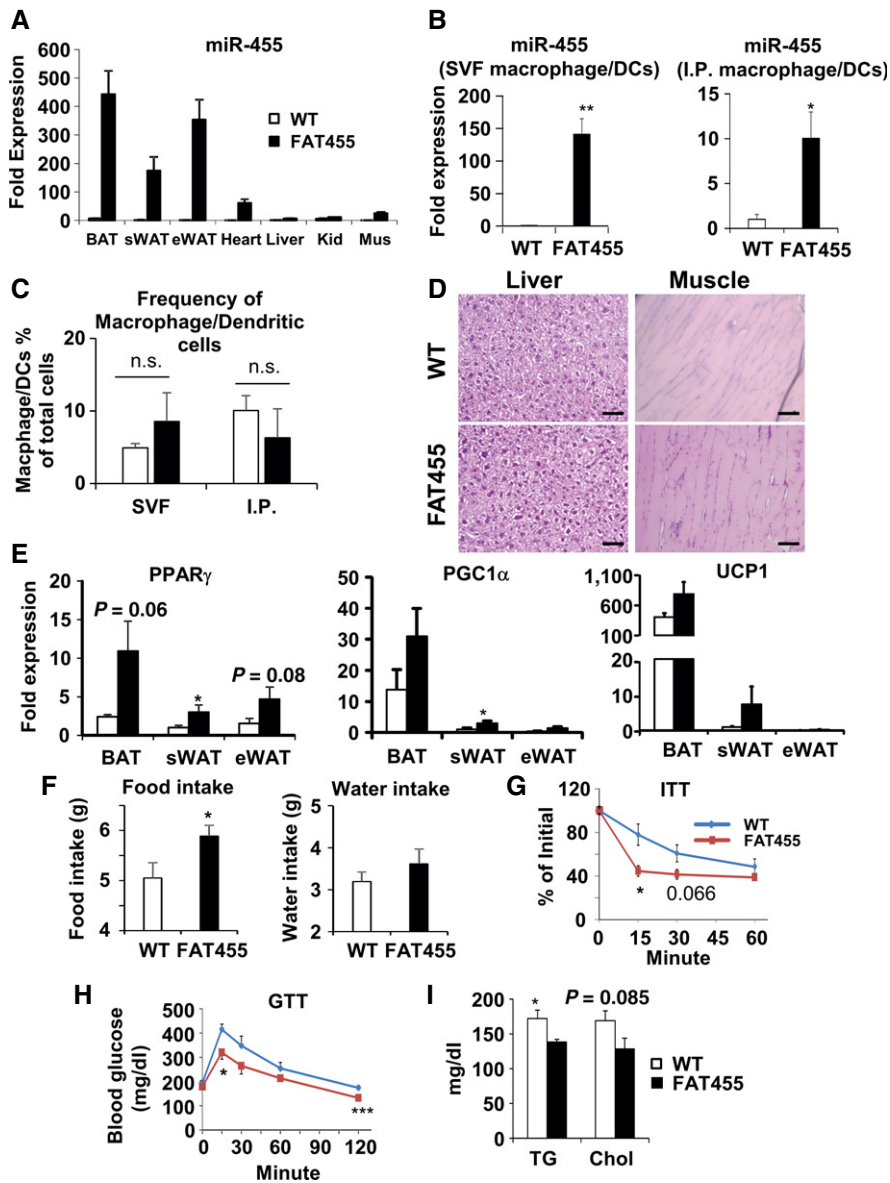

**Figure EV3. Characterization of FAT455 transgenic mice. FAT455 and WT mice aged 7–9 weeks were analyzed ( $n = 5–6$ /group).**

- A miR-455 expression in tissues of FAT455 transgenic mice analyzed by qRT-PCR.
- B, C Macrophage/dendritic cells were isolated from SVF (white adipose tissue) and intraperitoneal (i.p.) fluid by FACS using anti-F4/80 and CD11b antibodies. (B) miR-455 expression quantified by qRT-PCR. (C) The frequency of sorted macrophage/DC cells within total parental SVF or i.p. cells.
- D H&E staining of tissues from FAT455 mice or WT littermates, showing no visible effect of miR-455 in liver and muscle. Scale bar, 50  $\mu$ m.
- E qRT-PCR of brown adipogenic marker gene expression in FAT455 and WT littermates kept chronically at room temperature.
- F Food and water intake of FAT455 and WT littermates during a 36-h period.
- G IP-ITT assay.
- H IP-GTT assay.
- I Blood triglyceride (TG) and cholesterol (Chol) quantified by ELISA.

Data information: FAT455 and WT mice aged 7–9 weeks were analyzed ( $n = 5–6$ /group). Data were analyzed with Student's *t*-test and are presented as mean  $\pm$  SEM (\* $P < 0.05$ , \*\* $P < 0.01$ , and \*\*\* $P < 0.001$ ; n.s., non-significant).

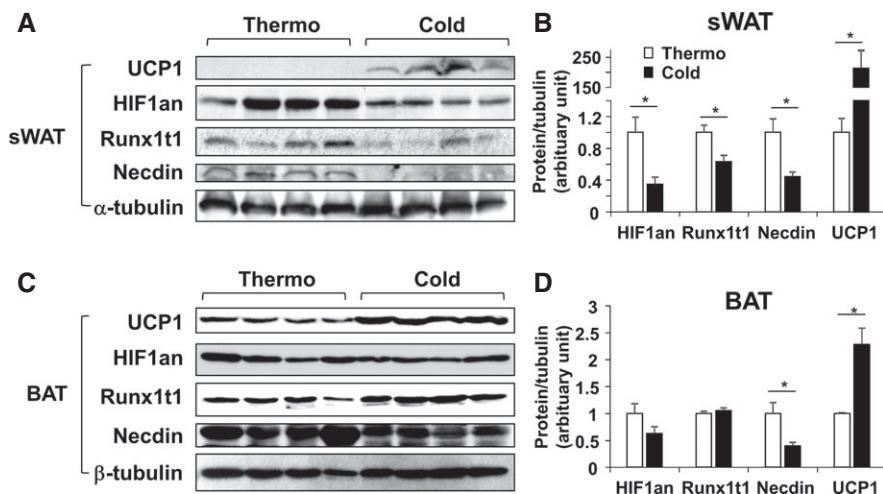

**Figure EV4. Cold exposure suppressed the miR-455 target proteins in adipose tissues.**

A–D C57BL/6 mice (4–7 mice/group) were maintained at thermoneutral (30°C) or cold (5°C) temperature for 7 days, and target gene expression was analyzed by Western blots (A, C) and quantified by densitometry (target protein levels normalized tubulin level) (B, D). Data were analyzed with Student's *t*-test and are presented as mean ± SEM (*n* = 4/group, \**P* < 0.05).

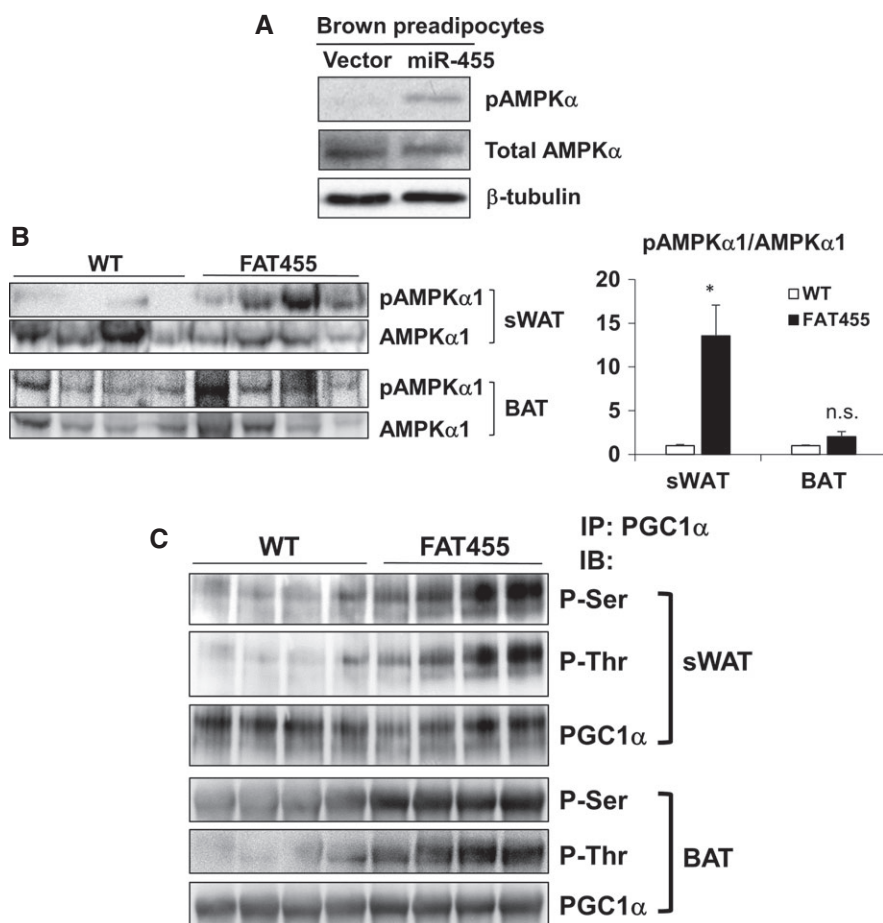

**Figure EV5. miR-455 induced phosphorylation of AMPKalpha1 and PGC1alpha.**

A miR-455 induced AMPK $\alpha$ 1 phosphorylation without affecting total AMPK $\alpha$ 1. Western blot analysis of AMPK $\alpha$  in brown preadipocytes (day 0, prior to the induction of differentiation) transfected by vector or miR-455 lentivirus.  
 B miR-455 induced AMPK $\alpha$ 1 phosphorylation *in vivo*. FAT455 and WT mice aged 5 weeks (*n* = 4) were exposed to cold (5°C) for 10 days and then sacrificed. sWAT and BAT were isolated. Western blot analysis was performed to examine AMPK $\alpha$ 1 phosphorylation using phospho-AMPK $\alpha$ 1 (Thr172)-specific antibody and AMPK $\alpha$ 1 antibody, and densitometry quantification of the Western blots was performed using ImageQuant, presented as mean ± SEM. Student's *t*-test was used for statistical analysis (\**P* < 0.05; n.s., non-significant).  
 C miR-455 enhanced PGC1 $\alpha$  phosphorylation *in vivo*. PGC1 $\alpha$  was immunoprecipitated from sWAT and FAT isolated from FAT455 and WT mice aged 5 weeks (*n* = 4) using anti-PGC1 $\alpha$  antibody and then probed with anti-phospho-serine and anti-phospho-threonine antibodies.
